# Supplementary material for: Volatile organic compounds in urine reveals distinct diagnostic signatures for gastric cancer
Source: Research Square preprint supplement (doi:10.21203/rs.3.rs-4609159/v1), 2024-07-26
Supplement: Supplementary file 1 [file c3d32d283ff34fac431feaba.docx]

Supplementary Materials for

Title: Breath volatiles as potential biomarkers for metabolic activity in colorectal cancer

**The PDF file includes:**

Table S1 to S2

Figures S1 to S4

**Supplementary Table**

Table S1. VOCs in serum, feces, and urine samples.

|  | VOCs in feces | VOCs in urine | VOCs in serum |
| --- | --- | --- | --- |
| 1 | Indole | Decanal | Eugenol |
| 2 | Nonanal-M | Nonanal-M | 2-Hydroxy-3-methyl-2-cyclopenten-1-one |
| 3 | 2-Phenylacetaldehyde | Nonanal-D | 2-Octanone |
| 4 | 2-Ethyl-1-hexanol | Acetophenone | Benzaldehyde-M |
| 5 | Phenol | 2-Acetylthiazole | Benzaldehyde-D |
| 6 | Benzaldehyde-M | Octanal | 5-Methyl-3-heptanone |
| 7 | 2-Ethyl-6-methylpyrazine | 2-Octanone | Amyl acetate |
| 8 | Dimethyl trisufide | Dimethyl trisulfide | (Z)-4-Heptenal |
| 9 | 2-Octanol | Benzaldehyde-M | Cyclohexanone-M |
| 10 | 4,5-Dihydro-3(2H)-thiophenone | Benzaldehyde-D | Pentanoic acid |
| 11 | Pentanoic acid-M | Pentyl acetate | 3-Methylbutanoic acid-M |
| 12 | Pentanoic acid-D | Pentanoic acid | Butyl acetate-M |
| 13 | 2-Methylbutanoic acid-M | Butyl propanoate | Ethyl 2-hydroxypropanoate |
| 14 | 2-Methylbutanoic acid-D | 2-Heptanone-M | 3-Methyl-2-pentanone |
| 15 | 3-Methylbutanoic acid-M | 2-Heptanone-D | (E)-2-Pentenal |
| 16 | 3-Methylbutanoic acid-D | (E)-2-Hexenal | 2-Pentanone |
| 17 | Butanoic acid-M | Ethyl butanoate-M | 2,3-Pentandione |
| 18 | Butanoic acid-D | Ethyl butanoate-D | Acetic acid |
| 19 | 2-Methylpropanoic acid-M | 2-Hexanone-M | Ethanol |
| 20 | 2-Methylpropanoic acid-D | 2-Hexanone-D | Pentanal |
| 21 | Propanoic acid-M | Hexanal-M | 2-Heptanone |
| 22 | 3-Butenenitrile | Hexanal-D | Ethyl 2-methylbutanoate |
| 23 | Propanoic acid-D | 2-Methylpropanoic acid-M | Propyl acetate |
| 24 | Limonene-M | 2-Methylpropanoic acid-D | 3-Methylbutanoic acid-D |
| 25 | Hexanoic acid-M | Pyrrole | Hexanoic acid |
| 26 | Hexanoic acid-D | 2-Pentanone-D | Propanal |
| 27 | Benzaldehyde-D | 2-Pentanone-M | Acetone |
| 28 | 2-Butoxyethanol-M | Propyl acetate-M | Acetophenone |
| 29 | 2-Butoxyethanol-D | Propyl acetate-D | 3-Octanone |
| 30 | Hexanal | Pentanal-M | Butyl acetate-D |
| 31 | 2-Methyl-1-butanol | Pentanal-D | 4-Methyl-3-penten-2-one |
| 32 | Propyl acetate | (E)-2-Pentenal | Pentanol |
| 33 | 2-Methylpentanal | Methylpyrazine | Cyclohexanone-D |
| 34 | 3-Methylbutanal | N-Methylpyrrolidone | 2-Hydroxybenzaldehyde |
| 35 | 2-Butanone | Ethyl Acetate | 2-Ethyl-1-hexanol |
| 36 | 1-Penten-3-one | Propanal | 1(H)-Indole |
| 37 | Heptanal | Cyclopentanone | 2-Octanol |
| 38 | Amyl acetate | 2-Ethyl-1-hexanol | Heptanol |
| 39 | 4-Methyl-3-penten-2-one | 2-Acetylpyridine | 2-Methyl-3-furanthiol |
| 40 | Butanol | Ethyl 2-methylpentanoate | gamma-Butyrolactone |
| 41 | Propanol | m-Xylene | Decanol |
| 42 | Pentanol | Methional | Butylcyclohexane-M |
| 43 | 2-Heptanone | 2-Cyclohexen-1-one | Butylcyclohexane-D |
| 44 | alpha-Pinene | 2-Acetylpyrazine | 3-Butenenitrile |
| 45 | 2-Octanone | delta-Hexalactone |  |
| 46 | Hexanenitrile | Benzenemethanol |  |
| 47 | Hexanol-M | 6-Methyl-5-hepten-2-one |  |
| 48 | Ethyl trans-2-butenoate | 2-Furanmethanol |  |
| 49 | (E)-2-Pentenal | Cyclohexanone |  |
| 50 | Propyl sulfide | Dipropyl sulfide |  |
| 51 | Benzenemethanol | 2-Ethylfuran |  |
| 52 | 2-Nonanone | Butyl acetate |  |
| 53 | Ethyl acetate | 2-Butanone |  |
| 54 | Dimethylamine | Citronellal |  |
| 55 | 3-Methyl-1-butanol | Myrcene |  |
| 56 | Methional | Methyl salicylate |  |
| 57 | 2-Hexanol | Maltol |  |
| 58 | 1.8-Cineole-M | Carvacrol |  |
| 59 | 1,8-Cineole-D | Carvone |  |
| 60 | Ethyl butanoate | Decanoic acid |  |
| 61 | 1-Octen-3-ol | Heptanal |  |
| 62 | 2-Methylbutanal | 3-Methyl valeric acid |  |
| 63 | gamma-Terpinene | Acetic acid |  |
| 64 | p-Cymene | (E)-Caryophyllene |  |
| 65 | Linalool | beta-Citronellol |  |
| 66 | Thiazole | Isophorone |  |
| 67 | Cyclohexanone | alpha-Pinene |  |
| 68 | beta-Pinene | 2-Octanol |  |
| 69 | 2-Pentylfuran | 3-Methyl-2-butenal |  |
| 70 | 2-Methyl-3-furanthiol | 1-Octen-3-one |  |
| 71 | 3-Hydroxy-2-butanone | Cyclohexen-2-one-M |  |
| 72 | Hexanol-D | Cyclohexen-2-one-D |  |
| 73 | Limonene-D | 2,2,4,6,6-Pentamethylheptane |  |
| 74 | Nonanoic acid | Eugenol |  |
| 75 | Methyl salicylate | 2-Undecanone |  |
| 76 | Nonanal-D | 4-Terpinenol |  |
| 77 | (E)-2-Decenal | 1-Phenylethyl acetate |  |
| 78 | Benzyl acetate-M | Benzoic acid |  |
| 79 | Benzyl acetate-D | 1,8 Cineole-M |  |
| 80 | 4-Methylphenol | 1,8 Cineole-D |  |
| 81 | 2-Isopropyl-3-methoxypyrazine | alpha-Phellandrene |  |
| 82 | 1-hydroxy-2-propanone | Camphene |  |
| 82 | Propyl butanoate | 2-Methylbutanoic acid |  |
| 84 | 3-Methylbutanoic acid | 3-Methylbutanoic acid |  |

**Table S2. Liner regression model results.**

| VOC | Factor | *P*-value |
| --- | --- | --- |
| Acetophenone | Gender | 0.63 |
|  | Age | 0.23 |
|  | BMI | 0.17 |
| 6-Methyl-5-hepten-2-one | Gender | 0.58 |
|  | Age | 0.87 |
|  | BMI | 0.19 |
| Cyclohexanone | Gender | 0.09 |
|  | Age | 0.73 |
|  | BMI | 0.94 |
| Decanoic acid | Gender | 0.66 |
|  | Age | 0.26 |
|  | BMI | 0.17 |
| Camphene | Gender | 0.46 |
|  | Age | 0.31 |
|  | BMI | 0.09 |
| 3-Methylbutanoic acid | Gender | 0.24 |
|  | Age | 0.77 |
|  | BMI | 0.37 |

**Supplementary Figure**


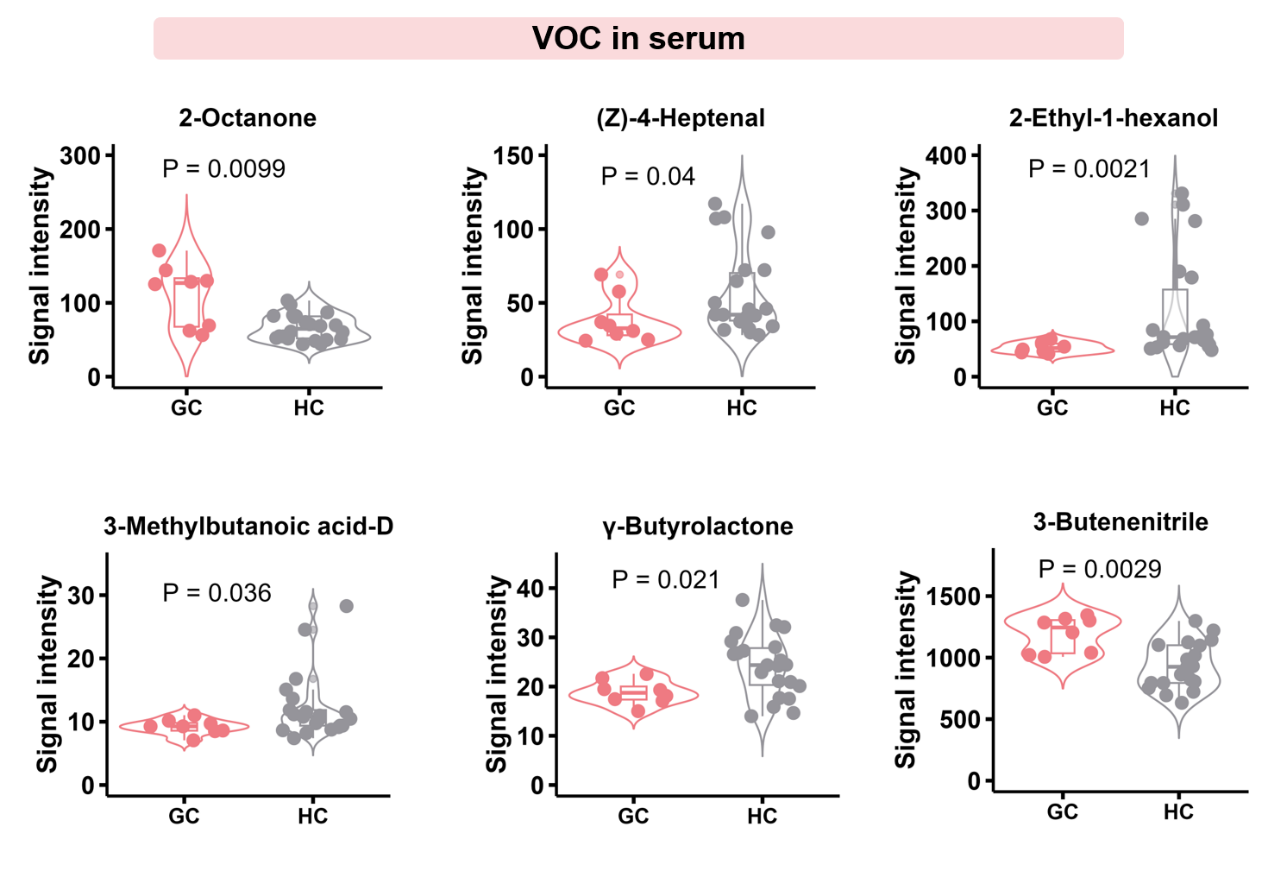


Figure S1. VOC significantly differentiating between gastric cancer (GC) and healthy control (HC) in serum samples. Mann-Whitney *U* test with Bonferroni adjusted *P* value indicated on top.

**
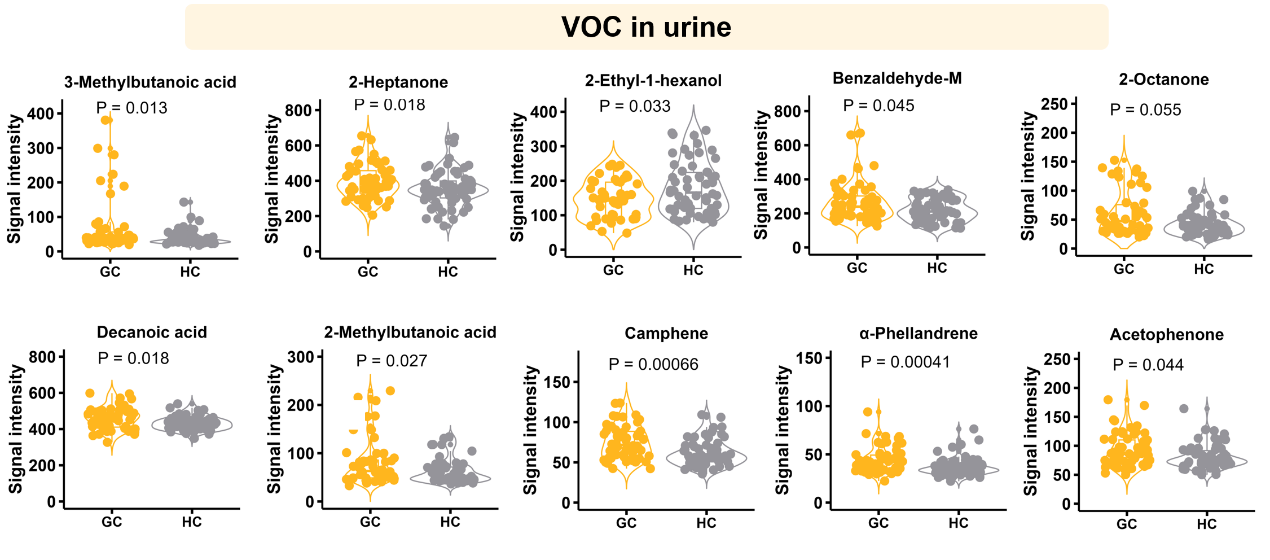
**

Figure S2. VOC significantly differentiating between gastric cancer (GC) and healthy control (HC) in urine samples. Mann-Whitney *U* test with Bonferroni adjusted *P* value indicated on top.

**
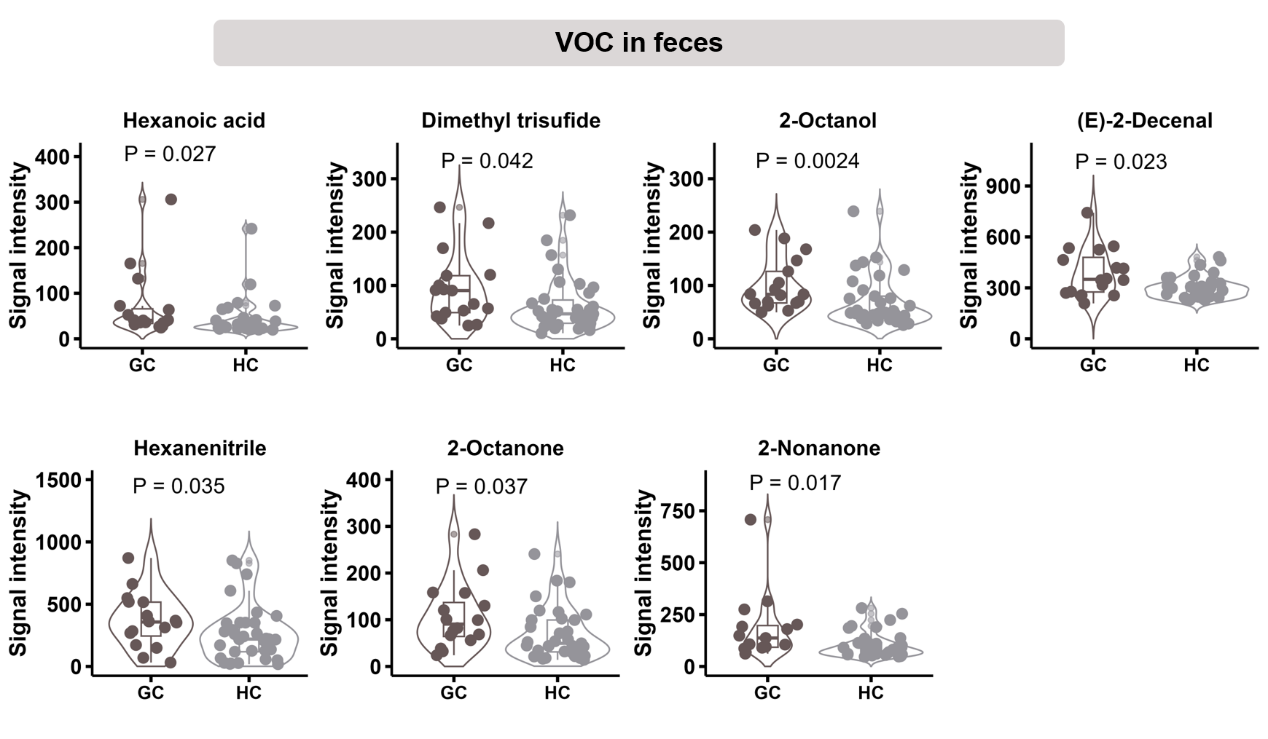
**

Figure S3. VOC significantly differentiating between gastric cancer (GC) and healthy control (HC) in feces samples. Mann-Whitney *U* test with Bonferroni adjusted *P* value indicated on top.

**
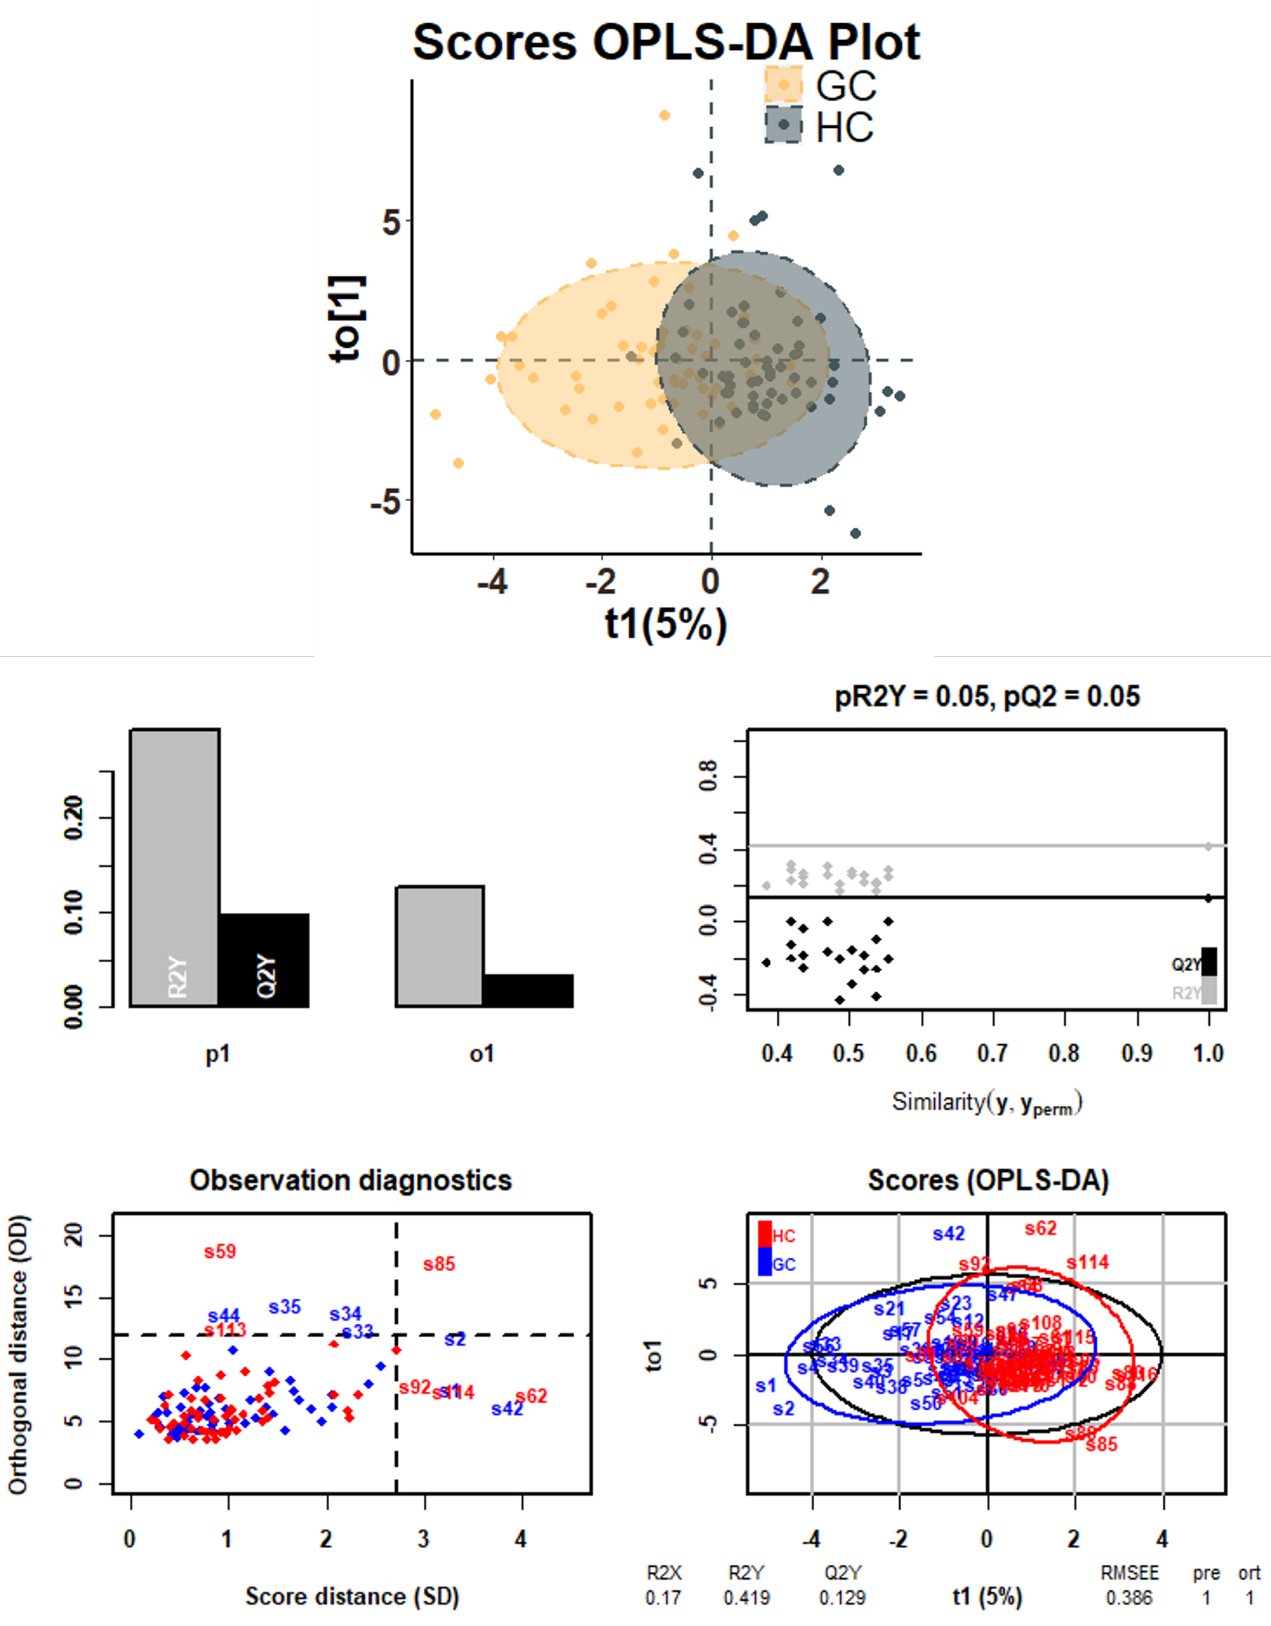
**

Figure S4. Score plot of the OPLS-DA model generated on the urine VOCs dataset, indicating cancer-control separation. OPLS-DA model characteristics were R2Y = 0.28 and Q2Y = 0.15.
